# Supplementary figures and images for: Differences in Male-Killing Rickettsia Bacteria between Lineages of the Invasive Gall-Causing Pest Leptocybe invasa
Source: MDPI journal article supplement (doi:10.3390/insects14090757), 2023-09-11

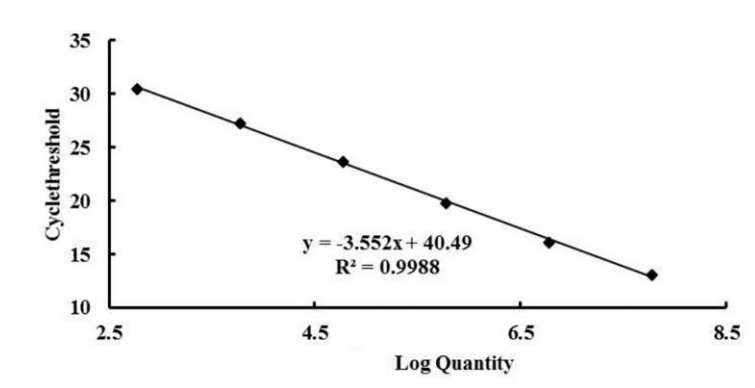

**Figure S1.** The Standard curve of *gltA* gene.

Supplement: s1 [file s1]
